1 **Cognate epitope recognition by bovine CD4 and CD8 T cells is essential for primary**  
2 **expansion of antigen-specific cytotoxic T-cells following ex vivo stimulation with a**  
3 **candidate *Mycobacterium avium subsp. paratuberculosis* peptide vaccine.**

4  
5 Gaber S. Abdellrazeq<sup>\*,†</sup>, Lindsay M. Fry<sup>‡</sup>, Mahmoud M. Elnaggar<sup>\*,†</sup>, John P. Bannantine<sup>§</sup>, David  
6 A. Schneider<sup>‡</sup>, William M. Chamberlin<sup>||</sup>, Asmaa H. A. Mahmoud<sup>\*,¶</sup>, Kun-Taek Park<sup>#</sup>, Victoria  
7 Hulubei<sup>\*</sup>, and William C. Davis<sup>\*</sup>

8  
9 <sup>\*</sup>Department of Veterinary Microbiology and Pathology, Washington State University, Pullman  
10 WA, USA

11 <sup>†</sup>Department of Microbiology, Faculty of Veterinary Medicine, Alexandria University, Egypt

12 <sup>‡</sup>USDA, ARS, Animal Disease Research Unit, Pullman, WA, USA

13 <sup>§</sup>USDA, ARS, National Animal Disease Center, Ames, Iowa, USA

14 <sup>¶</sup>Veterinary quarantine of Alexandria, General Organization for Veterinary Services,  
15 Ministry of Agriculture, Egypt

16 <sup>||</sup>Retired

17 <sup>#</sup>Department of Biotechnology, Inje University, Injero 197, Kimhae-si, Gyeongsangnam-do,  
18 Korea

19

20 Running Head: Cognate epitope recognition by bovine CD4 and CD8 T cells

21

22

23 Abstract

24

25 Studies in cattle show CD8 cytotoxic T cells (CTL), with the ability to kill intracellular bacteria,  
26 develop following stimulation of monocyte-depleted peripheral blood mononuclear cells  
27 (mdPBMC) with conventional dendritic cells (cDC) and monocyte-derived DC (MoDC) pulsed  
28 with MMP, a membrane protein from *Mycobacterium avium* subsp. *paratuberculosis* (*Map*)  
29 encoded by *MAP2121c*. CTL activity was diminished if CD4 T cells were depleted from  
30 mdPBMC before antigen (Ag) presentation by cDC and MoDC, suggesting simultaneous  
31 cognate recognition of MMP epitopes presented by MHC I and MHC II molecules might be  
32 essential for development of CTL activity. To clarify whether cognate recognition is essential for  
33 CTL development, studies were conducted with mdPBMC cultures in the presence of  
34 monoclonal antibodies (mAbs) specific for MHC class I and MHC class II molecules. The CTL  
35 response of mdPBMC to MMP-pulsed DC was completely blocked in the presence of mAbs to  
36 both MHC I and II molecules and also blocked in the presence of mAbs to either MHC I or  
37 MHC II. The results demonstrate CD4 T-cell help is essential for development of a primary CTL  
38 response to MMP, and indicate that cognate recognition is required for delivery of CD4 T-cell  
39 help during priming. Of importance, the findings provide support for the importance of CD4 and  
40 CD8 T-cell cognate antigen recognition in eliciting CTL responses to vaccines against  
41 intracellular pathogens. The methods described herein can be used to elucidate the intracellular  
42 interactions between lymphocytes and DC in humans and cattle.

43

44

45 **Introduction**

46

47 *Mycobacterium avium* subspecies *paratuberculosis* (*Map*) is a higher-order bacterial pathogen  
48 with a broad host range that includes livestock and humans (1, 2). Similar to *M. tuberculosis* and  
49 *M. bovis*, initial infection leads to development of a persistent infection under immune control. In  
50 some cases, immune control may become compromised, leading to granulomatous ileitis,  
51 malabsorption, wasting, and death (3).

52 Paratuberculosis (Ptb), also referred to as Johne's disease (JD) in ruminants, is a significant  
53 cause of livestock morbidity and mortality worldwide. The increased incidence of *Map* infection  
54 in ruminants has been accompanied by an increased prevalence of *Map* infection in humans.  
55 Some infected individuals have developed granulomatous ileitis similar to that observed in JD-  
56 infected ruminants. Interestingly, the lesions and the resultant intestinal illness are often  
57 observed in patients with Crohn's disease (CD) (2, 4, 5), and *Map* has been cultured from  
58 numerous patients with CD. Such observations have increased interest in developing methods to  
59 limit *Map* infection in livestock, thereby reducing the risk for human exposure.

60 With this objective in mind, we developed a candidate peptide-based vaccine for *Map* that  
61 elicits development of CD8 cytotoxic T cells capable of killing intracellular bacteria (6).  
62 Following inoculation with wild type (WT) *Map* or *Map* deletion mutants (*Map/ΔrelA* or  
63 *Map/ΔpknG* (7, 8)), calves develop both CD4 and CD8 T-cell proliferative responses to *Map*  
64 soluble antigens and Johnin (purified protein derivative, PPD made from *Map*), both before and  
65 after subsequent challenge with *Map* (9). Interestingly, only the *Map/ΔrelA* mutant was unable to  
66 establish a persistent infection. In addition, calves inoculated with *Map/ΔrelA* exhibited reduced

67 colonization by WT *Map* on subsequent challenge. These data indicated a difference in the  
68 immune response of calves to *Map/ΔrelA* as compared to that elicited by WT *Map* (9).

69 The immune response of a steer inoculated with *Map/ΔrelA* was evaluated in an attempt to  
70 understand why this mutant could not establish a persistent infection. PBMC, conventional  
71 dendritic cells (cDC) present within monocyte-depleted PBMC (mdPBMC), and monocyte-  
72 derived DC (MoDC) from a steer were pulsed with live *Map/ΔrelA* to examine the recall  
73 response (10). Initial studies showed stimulation of the calf's mdPBMC, with cDC and MoDC  
74 pulsed with *Map/ΔrelA* elicited a proliferative CD4 and CD8 T cell recall response. Analysis of  
75 effector activity revealed that the responding CD8 T cells were cytotoxic, killing intracellular  
76 bacteria (6). Minimal induction of cytotoxic activity was detected in the responding CD4 T cell  
77 population. Further analysis of the recall immune response to *Map/ΔrelA* revealed the target of  
78 the response was a 35 kDa membrane peptide known as MMP, encoded by *MAP2121c* (10). An  
79 identical CTL recall response was elicited when cDC and MoDC were pulsed with MMP (6).  
80 The recall responses to *Map/ΔrelA* and MMP were blocked in the presence of monoclonal  
81 antibodies (mAbs) specific for MHC class I and II molecules, verifying that the CD4 and CD8 T-  
82 cell responses were MHC class I and II-restricted.

83 Further investigation utilized blood from uninoculated steers and revealed the same CTL  
84 response could be elicited entirely ex vivo by using two rounds of stimulation of cDC and MoDC  
85 pulsed with MMP (6). The proliferative and CTL responses were reduced if either CD4 or CD8  
86 T cells were depleted from mdPBMC before DC were pulsed with MMP. This finding suggested  
87 the co-presence of CD4 and CD8 T cells with MMP pulsed DC is required to elicit the maximum  
88 proliferative and CTL responses. The present study was conducted to explore this possibility in  
89 greater detail. As reported, the data provide evidence showing MMP is taken up by DC (cDC and

90 MoDC) via the exogenous route and processed for Ag presentation by MHC class I and MHC  
91 class II molecules. Depletion of either CD4 or CD8 T cells in mdPBMC prior to Ag stimulation  
92 reduced the proliferative and CTL responses to MMP processed and presented by DC. The  
93 proliferative and CTL responses were blocked in the presence of antibodies to either or both  
94 MHC I and MHC II. The data provide evidence that the generation of primary CTL responses to  
95 MMP require simultaneous cognate recognition of antigenic peptides presented by MHC class I  
96 and II molecules. The findings presented in the study reveal a critical component of the immune  
97 response to peptide-based vaccines.

98

99

100

101

102

103

104

105

106

107

108

109

110

111

112

113 **Material and methods**

114 *Animals*

115 Three Holstein steers were obtained from the *Map*-free Washington State University (WSU)  
116 dairy herd in 2017. The steers were kept in an open feed lot and used as a source of blood to  
117 conduct the ex vivo studies on the immune response to MMP. Steers were maintained by the  
118 WSU animal care staff, and all protocols were approved by the WSU Institutional Animal Care  
119 and Use Committee (ASAFs 3360 and 04883).

120

121 *Preparation of MMP and Map K10*

122 The full length MMP used for antigen presentation by antigen presenting cells (APC) is encoded  
123 by *MAP2121c* in the K-10 genome (11). It was expressed in ClearColi as a maltose-binding  
124 protein fusion for purification (12). Cultures of *Map* K10 were prepared from single colonies and  
125 used to inoculate Middlebrook 7H9 broth flasks (Difco, BD biosciences, USA) supplemented  
126 with 6.7% para-JEM GS (Trek Diagnostic Systems, OH), 2 µg/mL mycobactin J (Allied  
127 Monitor, MO, USA), and 0.05 % Tween 80 (Sigma-Aldrich Corp.) (9, 13). The cultures were  
128 expanded on a shaking stand at 37°C. When the broth cultures reached an OD600 of 0.6 to 0.8,  
129 master stocks were prepared in 1.5 mL micro-centrifuge screw-cap tubes for immediate use in  
130 each experiment. To ensure a single-cell suspension, bacterial stocks were disaggregated by  
131 passages through a 26-gauge needle three times, and bacterial numbers were estimated based on  
132 the final OD600 values (13).

133

134 *Blood processing for cell separation and culture*

135 The flow diagram in Figure 1 illustrates the protocols used to conduct studies with cells obtained  
136 from the three *Map*-negative Holstein steers. As illustrated in Fig. 1, peripheral blood  
137 mononuclear cells (PBMC) were prepared by density gradient centrifugation using Ficoll-  
138 Hypaque (0.077). One portion of the PBMC was used to generate MoM $\Phi$  for use in the viability  
139 assay as described below. The second PBMC portion was labelled with magnetic microbeads  
140 coated with a cross-reactive anti-human CD14 mAb to isolate monocytes per the manufacturer's  
141 instructions (Miltenyi Biotec) (14). The average purity of isolated CD14<sup>+</sup> cells was greater than  
142 98%, as determined by FC analysis using an anti-bovine CD14 mAb, CAM36A (15, 16).  
143 Monocytes ( $2 \times 10^6$ ) were added to wells of six well culture plates and cultured in 3 mL of  
144 complete culture medium (cRPMI) [RPMI-1640 medium with GlutaMAX<sup>TM</sup> (Life Technologies,  
145 CA) supplemented with 10 % calf bovine serum (CBS), 1 mM  $\beta$ -mercaptoethanol, 100 units/mL  
146 of penicillin G, and 100  $\mu$ g/mL of streptomycin sulfate] in the presence of a DC growth cocktail  
147 containing bovine GM-CSF and IL-4 (Kingfisher Biotech, MN). On the third day, 1.4 mL of the  
148 medium was replaced with 1.8 mL of fresh medium containing the cocktail. The cultures were  
149 incubated for an additional three days to obtain MoDC.

150 The mdPBMC were initially incubated for 30 minutes at 37°C, 5% CO<sub>2</sub> with the following  
151 combinations of the primary mAbs with no azide (1  $\mu$ g each/  $10^6$  cells): Anti-CD8 and anti-  $\gamma\delta$  T  
152 cells; Anti-CD4 and anti-  $\gamma\delta$  T cells; and anti-  $\gamma\delta$  T cells. After incubation, cells were washed  
153 three times with warm RPMI to remove unbound antibodies.

154 The three sets of primary mAb-treated mdPBMC were then incubated for 15 minutes at 4°C  
155 with anti-mouse IgG2a+b microbeads per the manufacturer's instructions (Miltenyi Biotec).  
156 After incubation, the cells were washed two times with cold MACS buffer (a solution containing  
157 phosphate- buffered saline (PBS), pH 7.2, 0.5% bovine serum albumin (BSA), and 2 mM

158 EDTA) to remove the unbound microbeads, and then re-suspended in the same buffer. For  
159 magnetic separation, LS columns were placed in the magnetic field of a MACS Separator and  
160 rinsed with 3 mL of MACS buffer, and cell suspensions were loaded onto the wet columns.  
161 Flow-through containing the following three unlabeled cell fractions of mdPBMC were collected  
162 (negative selection): CD4 T cells, CD8 T cells and CD4/CD8 T cells. Unseparated mdPBMC  
163 were also maintained for use as positive and negative control wells.

164 The three mdPBMC fractions and unseparated mdPBMC were subjected to two rounds of  
165 antigenic stimulation using MMP. To conduct the first round of stimulation, cells were  
166 distributed in the 6-well culture plate in duplicate ( $2 \times 10^6$ /mL in 5 mL of cRPMI). MMP (5  
167  $\mu$ g/mL) was added to each well and incubated for 6 days at 37°C, 5% CO<sub>2</sub> to allow MMP  
168 processing and presentation by cDC present in the mdPBMC. To conduct the second round of  
169 stimulation after 6 days of culture, MMP (5  $\mu$ g/mL) was added to the cultures of MoDC and  
170 incubated for 3 hours at 37°C, 5% CO<sub>2</sub>. The adherent MoDC were then carefully washed 3 times  
171 with warm RPMI to remove the cell-free MMP. The primed cells were collected, washed twice  
172 with warm RPMI, and added to their respective autologous MoDC pulsed with MMP ( $2 \times$   
173  $10^6$ /mL in 5 mL of cRPMI). After six additional days of culture, the cells were collected and  
174 used in FC and the *Map* viability assay as described below. A portion of the unseparated  
175 mdPBMC was maintained as a negative control with no antigen stimulation during the two  
176 weeks of cell culture.

177

#### 178 *Viability assay*

179 Control and antigen-stimulated mdPBMC and CD4 T-cell, CD8 T-cell, and CD4/CD8 T-cell  
180 fractions were used as effector CTLs in the viability assay.



181

182 *Generation of MoMΦ for use as target cells*

183 As mentioned above, one portion of fresh PBMC was re-suspended in cRPMI transferred into  
184 150 mm tissue culture plates and incubated overnight. The majority of the non-adherent cells  
185 were then removed the following day. The adherent cells were cultured in fresh medium for six  
186 days then brought into suspension by incubation on ice in the presence of EDTA in PBS (4 mL  
187 EDTA [250 mM stock in H<sub>2</sub>O], 5 mL CBS, 91 mL PBS). The MoMΦ were distributed into six  
188 well culture plates ( $2 \times 10^6$  cells/ well) and cultured for an additional six days, and then used as  
189 target cells in the viability assay.

190

191 *Infection of target cells with Map K10*

192 MoMΦ were infected with *Map* K10 at a multiplicity of infection (MOI) of 10:1 ( $2 \times 10^7$  *Map* to  
193  $\sim 2 \times 10^6$  MoMΦ/well) in antibiotic-free cRPMI. Culture plates were centrifuged at  $700 \times g$  for  
194 five minutes, then incubated at 37°C, 5% CO<sub>2</sub> for 3 hours. Extracellular bacteria were removed  
195 by washing five times with warm, antibiotic-free RPMI using gentle suction to avoid detaching  
196 adherent MoMΦ. Two wells from each of the respective sets of 6 wells, containing *Map* infected  
197 MoMΦ, were used as controls, without addition of primed or unprimed preparations of  
198 mdPBMC.

199

200 *Incubation of effector T cells with infected target cells*

201 Stimulated and control mdPBMC and T-cell fractions were collected and added to the  
202 preparations of infected MoMΦ. Co-cultures were incubated for 24 hours at 37°C, 5% CO<sub>2</sub>. Non-  
203 adherent cells were collected, then adherent cells were detached and collected as described

204 above. Finally, collected adherent and non-adherent cells were recombined for analysis of *Map*  
205 viability.

206

### 207 *Cell lysis*

208 Following collection, cells were lysed by adding 2 mL of 0.01% saponin in H<sub>2</sub>O and incubated at  
209 37°C for 15 minutes. The cell lysates were centrifuged for 30 minutes at 4,500 rpm to pellet the  
210 bacteria. The supernatants were discarded and the pellets re-suspended in 1 mL H<sub>2</sub>O and  
211 transferred into micro-centrifuge tubes, then centrifuged at 14,000 rpm for 10 minutes. The  
212 supernatants were discarded, and the pellets re-suspended in 400 µl of H<sub>2</sub>O in 1.5 mL translucent  
213 Eppendorf tubes and stored at -20°C until used.

214 A set of controls was prepared from known mixtures of live and dead *Map* K10. This set of  
215 controls covered the dynamic range for detection of live vs dead *Map* obtained from infected  
216 MoMΦ before and after incubation with CTL. Aliquots of *Map* mixed in five ratios, 100% live,  
217 75% live/25% killed, 50% live/50% killed, 25% live/75% killed, and 100% killed, were prepared  
218 to obtain  $2 \times 10^7$  total *Map* in each aliquot, added to the cultures of MoMΦ at a MOI of 10, and  
219 incubated for 3 hours as described previously (6). The cultures were then washed to remove free  
220 bacteria. Adherent cells were collected and transferred into new 15 mL tubes.  $10^7$  fresh  
221 mdPBMC were added for each tube and all the cells were mixed followed by centrifugation. The  
222 cell pellet in each tube was lysed with saponin as described above, and lysates stored at -20°C  
223 until use.

224

225 *PMA treatment, DNA extraction and qPCR*

226 Propidium monoazide (PMA) treatment of the cell lysates was carried out as previously  
227 described (6). Briefly, 1  $\mu$ l of 20 mM PMA working stock solution was added to 400  $\mu$ l of each  
228 previously prepared cell lysates to reach a final dye concentration of 50  $\mu$ M. The translucent  
229 PMA-treated tubes were incubated at room temperature for five minutes in the dark on a rocker.  
230 The tubes were then placed in a plastic tray prepared with a frozen ice pack wrapped in  
231 aluminum foil. The tray was then placed on a rocking platform to ensure continuous mixing  
232 during light exposure. Light exposure was performed for five minutes using a halogen lamp with  
233 a 650 W bulb placed at a distance of  $\sim$  20 cm from the tubes. Cells were subsequently harvested  
234 by centrifugation at  $10,000 \times g$  for five minutes. Supernatants were discarded, and the cell pellets  
235 processed for DNA isolation (17).

236 DNA extraction was performed according to the protocol for Gram-positive bacteria using  
237 DNeasy® Blood and Tissue kit (Qiagen, USA) following enzymatic lysis to facilitate breakdown  
238 of the *Map* cell wall as described by Park et al. (17). TaqMan Quantitative Real-Time PCR,  
239 targeting the single copy F57 gene specific for *Map* (F57 qRT-PCR) was used to determine the  
240 activity of intracellular *Map* killing as described by Kralik et al. (18) and Abdellrazeq et al. (6).  
241 The reaction was performed according to Schöenenbrücher et al. (19) using a StepOnePlus Real-  
242 Time PCR machine (Applied Biosystems, CA). *Map* gDNA prepared from pure culture was used  
243 to generate a standard curve with the F57 probe, made with 8 dilutions starting with  $4 \times 10^7$   
244 copies down to 4 copies. The sequences of the primers and probes were the same as previously  
245 described (17). The total reaction volume was 25  $\mu$ L including 5  $\mu$ L of the DNA sample, and  
246 reactions were run for 40 cycles. The mean values of the cycle threshold ( $C_T$ ) were analyzed  
247 using StepOne Software v2.1 (Applied Biosystems, CA).  
248

249 *MHC blocking*

250 Three identical sets of unseparated mdPBMC cultures were prepared in the presence of mAbs  
251 specific for either or both MHC I and MHC II (0.5 µg/ml) (Table 1). Cultures were subjected to  
252 two rounds of stimulation with MMP as described above, and cell activation and proliferation  
253 assessed using FC. The resultant cultures of cells were then incubated with infected MoMΦ for  
254 24 hours. The cells were collected and processed to determine the CTL activity in each  
255 preparation of cells using the bacterium viability assay as described.

256

257 *Flow cytometric analysis*

258 After the second round of antigen stimulation, cells were washed once in PBS/ACD, centrifuged,  
259 re-suspended in serum-free RPMI and counted. For antibody labeling, cells were distributed into  
260 96-well polystyrene V-bottom microplates (10<sup>6</sup> cells/well). Combinations of mAbs (Table 1)  
261 obtained from the WSU Monoclonal Antibody Center (WSUMAC) were used for labeling as  
262 previously described (20). Data were collected on a modified FACS Calibur DxP8 Analyzer  
263 equipped with a FlowJo operating system (Cytex Biosciences Inc. Fremont, CA) and analyzed  
264 with FCS Express software (DeNovo Software, Glendale, CA) (15). The gating strategy used to  
265 collect the data is shown in Fig. 2. Side scatter (SSC) and forward scatter (FSC) were used to  
266 identify small and large lymphocytes. FSC-Height vs FSC-Width (FSC-H vs FSC-W) was used  
267 to exclude doublets. Selective electronic gating was used to isolate CD4 and CD8 T cells for  
268 determination of their activation status.

269

270 *Statistical methods*

271 Data were imported into SAS software (SAS for Windows, version 9.3) for statistical analysis  
272 and graphical presentation. The data were analyzed using a mixed modeling procedure (PROC  
273 GLIMMIX). For proportional response data (proportion activated T cells), statistical models  
274 included the main fixed effects of MMP stimulation (MMP, diluent control) and T cell type  
275 (CD4, CD8), the interaction term of these effects, and was based on the binomial response  
276 distribution and Kenward-Roger degrees of freedom approximation. These experiments were  
277 considered to be of hierarchical design; the corresponding statistical models thus included  
278 random residuals defined by T cell types nested within each subject (blood donor steer), and an  
279 unstructured (Cholesky) covariance matrix. Multiple comparisons were adjusted using the  
280 method of Holm-Tukey (overall  $\alpha = 0.05$ ).

281 For  $C_T$  response data (qPCR estimation of intracellular *Map* killing), statistical models  
282 included the single main fixed effect of manipulating the mdPBMC context of MMP stimulation  
283 (manipulation of T cell context or manipulation of MHC I and II context, each with controls).  
284 These analyses were based on the Poisson response distribution and Kenward-Roger degrees of  
285 freedom approximation, and included a random effect of residuals defined by subjects and using  
286 the default variance component structure of the covariance matrix. Under these experimental  
287 scenarios, only comparisons of interest were made utilizing the Dunnett method of adjustment  
288 for multiple comparisons (overall  $\alpha = 0.05$ ).

289

290

291

## 292 **Results**

293 *The proliferative response of mdPBMC is reduced if either CD4 or CD8 T cells are depleted*  
294 *before stimulation with MMP*

295 The experiments were conducted to verify and gain further insight into the effect of CD4 and  
296 CD8 depletion on CTL development following MMP stimulation. Negative selection was used to  
297 deplete either CD4 or CD8 T cells from mdPBMC. The depletion strategy included use of a mAb  
298 to the  $\delta$  chain of the  $\gamma\delta$  TCR to exclude any potential effect of  $\gamma\delta$  T cells on the proliferative  
299 response to MMP. Previous studies established that NK cells do not contribute to the  
300 proliferative response to MMP (6). Little difference could be detected between the untreated  
301 positive control preparation of mdPBMC and preparations depleted of either CD4 or CD8 T cells  
302 after one round of stimulation with MMP (not shown). However, clear differences were evident  
303 after two rounds of stimulation (Fig. 3).

304 mdPBMC incubated with MMP had significantly larger ( $F_{\text{MMP}}=168.06$ ,  $P=0.0002$ )  
305 proportions of activated CD4 T cells ( $P_{\text{adj}}=0.0005$ ) and activated CD8<sup>+</sup> T cells ( $P_{\text{adj}}=0.0013$ )  
306 than mdPBMC incubated without MMP. Significant differences were not detected between the  
307 proportions of activated CD4 and CD8 T cells within the mdPBMC ( $F_{\text{CD}}=0.7277$ ,  $P=0.7277$ ) nor  
308 in the change induced by MMP ( $F_{\text{MMP*CD}}=2.61$ ,  $P=0.1816$ ).

309 The cellular context during incubation with MMP did have a significant effect on the  
310 proportions of activated T cells ( $F_{\text{Context}}=44.68$ ,  $P=0.0053$ ). Post-hoc comparisons were limited to  
311 within each cell type since the effects on the two phenotypes of T cells were parallel (see Fig. 3)  
312 and only marginally different in magnitude ( $F_{\text{Context*CD}}=13.23$ ,  $P=0.0308$ ). The proportion of  
313 activated CD4 T cells in mdPBMC depleted of both CD8 T cells and  $\gamma\delta$  T cells was significantly  
314 less than the proportions present in whole mdPBMC ( $P_{\text{adj}}=0.0327$ ) and mdPBMC depleted of

315 only  $\gamma\delta$  T cells ( $P_{adj}=0.0225$ ). The proportion of activated CD4 T cells in mdPBMC depleted of  
316  $\gamma\delta$  T cells was not significantly different than that in whole mdPBMC ( $P_{adj}=0.0542$ ).

317 Similarly, the proportion of activated CD8 T cells in mdPBMC depleted of both CD4 T cells  
318 and  $\gamma\delta$  T cells was significantly less than the proportions within whole mdPBMC ( $P_{adj}=0.0131$ )  
319 and mdPBMC depleted of only  $\gamma\delta$  T cells ( $P_{adj}=0.0022$ ). The proportion of activated CD8 T cells  
320 in mdPBMC depleted of only  $\gamma\delta$  T-cells was not significantly different than that in whole  
321 mdPBMC ( $P_{adj}=0.0786$ ).

322

323 *The CTL activity of mdPBMC is reduced if either CD4 or CD8 T cells are depleted before*  
324 *stimulation with MMP*

325 In conjunction with experiments to investigate the effects of T-cell depletion on the proliferative  
326 response to MMP, one set of cell preparations was used to determine the effects of depletion on  
327 CTL activity against intracellular *Map* in target MoM $\Phi$  (Fig. 4). Manipulation of cellular context  
328 did significantly affect killing of intracellular bacteria (as estimated by  $C_T$ ;  $F=16.40$ ,  $P<0.0001$ ).  
329 Fig. 4 depicts the outcomes of this experiment relative to a standardized scale of intracellular  
330 killing whereas statistical comparisons to the maximal killing produced by whole mdPBMC 24-  
331 hours post stimulation with MMP are shown in Fig. 5. The intracellular killing of *Map* in MoM $\Phi$   
332 co-cultured with MMP-stimulated whole mdPBMC was significantly greater than the control  
333 conditions (vs. MoM $\Phi$  at 0-hours and at 24-hours post-stimulation, each  $P_{adj}<0.0001$ ; vs. MoM $\Phi$   
334 -control at 24-hours post-stimulation,  $P_{adj}=0.0005$ ). A significant reduction in intracellular killing  
335 of *Map* was not detected when only  $\gamma\delta$  T-cells were depleted from mdPBMC prior to MMP  
336 stimulation ( $P_{adj}=0.4682$ ), but was detected with the additional depletion of CD4 T cells  
337 ( $P_{adj}=0.0457$ ) or CD8 T cells ( $P_{adj}=0.0089$ ).

338

339 *Development of CD8 CTL to Map is inhibited by mAb blockade of MHC class I and/or class II*  
340 *molecules*

341 Depletion experiments confirmed the requirement of both CD4 and CD8 T cells during priming  
342 by DC for the generation of significant anti-*Map* CTL activity ex vivo. However, depletion  
343 experiments did not reveal whether development of CTL activity required cognate recognition of  
344 MMP epitopes presented on DC MHC I and MHC II molecules by CD4 and CD8 T cells during  
345 antigenic stimulation. Our previous studies of the recall response to *Map*/ $\Delta$ *relA* and MMP  
346 revealed the recall response was blocked in the presence of mAbs to both MHC I and MHC II  
347 molecules (10), but the effect of individual MHC class I or class II molecule blockade was not  
348 investigated. To complete the last set of experiments in this study, mdPBMC were stimulated  
349 with MMP in the presence of mAbs specific for either or both MHC I and MHC II molecules  
350 (Table 1). To maintain consistency with the initial studies, two mAbs were used for MHC I  
351 blockade and two mAbs (one specific for the bovine orthologue of HLA-DR, one specific for the  
352 bovine orthologue of HLA-DQ) were used for MHC II blockade. The effect of MHC molecule  
353 blockade on cell proliferation and the development of CTL activity against intracellular *Map* was  
354 significant ( $F=29.05$ ,  $P<0.0001$ ). The intracellular killing of *Map* by CTL in whole mdPBMC  
355 was significantly greater (all  $P_{adj}<0.0001$ ) than the negative control conditions and to that  
356 observed in cultures containing mAbs to either MHC I or MHC II molecules as well as in the  
357 presence of both MHC I and MHC II mAbs (Fig. 6).

358



## 359 **Discussion**

360 Extensive studies have been conducted to elucidate the mechanisms regulating development of  
361 CD8 CTL activity against viral and bacterial pathogens, intracellular parasites, and cancers with  
362 the long-term objective of vaccine development. Cumulative studies have shown DC play a  
363 central role in stimulating CTL activity through cross presentation of antigenic epitopes  
364 presented in context of MHC I molecules (reviewed in (21, 22)). What has not been fully  
365 explained in these studies is the role of CD4 T cells in the development of CD8 CTL activity.  
366 Indeed, reports on the role of CD4 T cell help seems to vary greatly between different model  
367 systems. Primary CTL response development to highly inflammatory targets, such as whole  
368 organism or bacterial membrane-based vaccines, are reported to be CD4 T cell independent (23,  
369 24), while CD4 T cell help during priming are reported to be necessary for the development of a  
370 functional memory CTL response to these antigens (25-28). CD4 T-cell help has also been  
371 reported to be necessary for activation of the CTL recall response. In contrast, the generation of  
372 both primary and recall CD8 CTL responses to poorly antigenic targets, including peptide  
373 immunogens and neoplastic cells, have been reported to require CD4 T cell help during priming  
374 and recall responses (Ridge et al., 1998, Bennett et al., 1998).

375 The mechanism of action of CD4 T cell help in these systems has not been clearly elucidated.  
376 Some studies have suggested CD4 T cells may play an indirect role and that interaction of  
377 CD154 (expressed on CD8 T cells) with CD40 (expressed on APC) might be the triggering event  
378 that initiates the primary activation and secondary expansion of CD8 T cells (reviewed in (29-  
379 31)). Results from other studies have suggested that cognate recognition of antigens presented in  
380 the context of DC MHC class II and class I molecules, coupled with subsequent stimulation by  
381 DC through ancillary receptor-ligand interactions, are key steps in priming CTL responses (32,

382 33). Although complex inbred mouse models have provided insight into the events associated  
383 with the generation of CTL in vivo, additional information is still needed to fully detail the  
384 events regulating development of CTL responses in outbred species, like cattle and humans. The  
385 present studies were conducted using an outbred bovine model system to characterize the CTL  
386 response to a candidate *Map* peptide-based vaccine.

387 Key to the development of our model system was the finding that CD209 is uniquely  
388 expressed on cDC in blood and MoDC in cattle (10). Due to the size of cattle, access to large  
389 volumes of blood obviated the difficulty in obtaining sufficient quantities of cDC for  
390 comparative studies with MoDC (10). The development of a bovine DC-lymphocyte culture  
391 system enabled dissection of primary and recall CTL immune responses to antigenic peptides  
392 presented in context of MHC I and MHC II molecules under defined conditions. The *Map/ΔrelA*  
393 major membrane protein antigen, MMP, provided a model peptide antigen to study factors  
394 affecting development of CTL to a candidate peptide vaccine. Finally, development of a  
395 bacterium viability assay provided a way to study the mechanisms used for the intracellular  
396 killing of *Map* in infected target cells (6).

397 Using a *Map/ΔrelA*-vaccinated steer, we first used our model system to dissect the ex vivo  
398 recall response to *Map/ΔrelA* and MMP. The studies demonstrated that the main cell subsets  
399 proliferating in response to stimulation with *Map/ΔrelA* or MMP-pulsed DC were CD4 and CD8  
400 T cells. The responses were MHC-restricted. Killing activity was mediated primarily by CD8 T  
401 cells through the perforin-granzyme B pathway (6). A preliminary CD4 T cell depletion study  
402 indicated development of CTL activity was reduced if CD4 T cells were removed from cultures  
403 before stimulation with Ag-pulsed DC (6). The data provided support for the supposition that

404 CD4 T cell help is essential for initiation of a functional CD8 T cell recall response to *Map/ΔrelA*  
405 and MMP.

406 Since CD4 T cell help during priming is often observed for the generation of a primary CTL  
407 response to non-inflammatory targets in mice, we conducted the present ex vivo study to  
408 determine if this observation was the same in regard to the *Map/ΔrelA* and MMP candidate  
409 vaccines. In this study, we found the primary CD8 CTL responses were significantly diminished  
410 in cultures depleted of CD4 T cells prior to antigenic stimulation by DC. We also found that  
411 CD8 CTL responses were blocked in whole mdPBMC cultures in the presence of mAbs specific  
412 for MHC class I and MHC class II molecules. Importantly, we observed there was complete  
413 blockade of CD4 and CD8 T cell activation in the presence of mAbs to either MHC I or MHC II  
414 alone. The data presented here provide evidence that cognate CD8 and CD4 T cell recognition of  
415 antigenic peptides presented on MHC I and MHC II molecules is essential for development of a  
416 functional primary CTL response to MMP.

417 The importance of CD4 and CD8 T cell cognate antigen recognition to the development of a  
418 functional primary CTL response to a bovine pathogen was previously demonstrated in one other  
419 study using an ex vivo *Theileria parva* culture system (34). In this study, *T. parva*-infected  
420 lymphocytes, which express MHC class I and class II molecules, were used as APC, and were  
421 cultured in the presence of *T. parva*-naïve CD8 T cells, with or without primed CD4 T cells. *T.*  
422 *parva*-specific CD8 CTL developed only in cultures that contained primed CD4 T cells.  
423 Furthermore, if the primed CD4 T cells were cultured in the same plate, but separated from the  
424 APC and CD8 T cells by a semi-permeable membrane, no primary CD8 CTL response to *T.*  
425 *parva* developed, indicating that direct cell-cell contact between APC, CD4 T cells, and CD8 T  
426 cells is required for the development of a primary CTL response in this system. This study, like

427 the present study, provides evidence of the importance of simultaneous cognate antigen  
428 recognition by CD4 and CD8 T cells for the development of a functional CTL response in the  
429 cattle.

430 In summary, analysis of the immune response to a *Map/relA* deletion mutant and a candidate  
431 peptide-based vaccine for *Map* in cattle have provided insight into factors regulating the  
432 development of CTL to an intracellular pathogen that are of universal importance. Deletion of  
433 *relA* disrupted the pathways used by *Map* to dysregulate the immune response and allowed for  
434 the development of an immune response that cleared the infection with the mutant. Analysis of  
435 the recall response revealed vaccination led to development of a CD8 CTL response that targeted  
436 a membrane protein, MMP. Analysis of the entire immune response to MMP ex vivo revealed  
437 simultaneous cognate recognition of antigenic peptides by CD4 and CD8 T cells, presented by  
438 DC pulsed with MMP is essential for generation of CTL against *Map*. Blocking of Ag  
439 presentation by mAbs to either MHC I or MHC II molecules blocked the proliferative and CTL  
440 responses to *Map*. The findings may have revealed an elusive component of the CTL response to  
441 pathogens. The ex vivo platform developed to conduct the studies provide an opportunity for  
442 further in depth studies in large outbred animal species like cattle and also humans.

443

444

445

446

447

448

449

450 **Acknowledgments**

451 The authors wish to acknowledge the excellent technical support and animal care provided by  
452 Emma Karol and her staff. The results of this study were presented orally in 2018 Berkeley  
453 conference (Mycobacterial Implications in Crohn's and Chronic Inflammatory Diseases),  
454 Lawrence Hall of Science | Berkeley, CA, USA.

455

456 **Disclosures**

457 The authors declare that they have no competing interests.

458

459

460

461

462

463

464

465

466

467

468

469

470

471 **References**

- 472 1. Singh SV, Kumar N, Sohal JS, Singh AV, Singh PK, Agrawal ND, Gupta S, Chaubey  
473 KK, Deb R, Dhama R, Rawat R. 2014. First mass screening of the human population to  
474 estimate the bio-load of *Mycobacterium avium* sub-species *paratuberculosis* in North  
475 India. JPHE 6:20-29.
- 476 2. Naser SA, Sagramsingh SR, Naser AS, Thanigachalam S. 2014. *Mycobacterium avium*  
477 subspecies *paratuberculosis* causes Crohn's disease in some inflammatory bowel disease  
478 patients. World J Gastroenterol 20:7403-7415.
- 479 3. Johne HA, Frothingham L. 1895. Ein eigenthumlicher fall von tuberculosis beim rind [A  
480 peculiar case of tuberculosis in a cow]. Deutsche Zeitschr Tierm Path 21, 438–454:438-  
481 454.
- 482 4. Davis WC, Kuenstner JT, Singh SV. 2017. Resolution of Crohn's (Johne's) disease with  
483 antibiotics: what are the next steps? Expert Rev Gastroenterol Hepatol  
484 doi:10.1080/17474124.2017.1300529:1-4.
- 485 5. Singh SV, Kuenstner JT, Davis WC, Agarwal P, Kumar N, Singh D, Gupta S, Chaubey  
486 KK, Kumar A, Misri J, Jayaraman S, Sohal JS, Dhama K. 2016. Concurrent Resolution  
487 of Chronic Diarrhea Likely Due to Crohn's Disease and Infection with *Mycobacterium*  
488 *avium paratuberculosis*. Front Med (Lausanne) 3:49.
- 489 6. Abdellrazeq GS, Elnaggar MM, Bannantine JP, Park KT, Souza CD, Backer B, Hulubei  
490 V, Fry LM, Khaliel SA, Torky HA, Schneider DA, Davis WC. 2018. A *Mycobacterium*  
491 *avium* subsp. *paratuberculosis* *relA* deletion mutant and a 35 kDa major membrane  
492 protein elicit development of cytotoxic T lymphocytes with ability to kill intracellular  
493 bacteria. Vet Res 49:53.

- 494 7. Walburger A, Koul A, Ferrari G, Nguyen L, Prescianotto-Baschong C, Huygen K, Klebl  
495 B, Thompson C, Bacher G, Pieters J. 2004. Protein kinase G from pathogenic  
496 mycobacteria promotes survival within macrophages. *Science* 304:1800-1804.
- 497 8. Dahl JL, Kraus CN, Boshoff HIM, Doan B, Foley K, Avarbock D, Kaplan G, Mizrahi V,  
498 Rubin H, Barry CEI. 2003. The role of RelMtb-mediated adaptation to stationary phase in  
499 long-term persistence of *Mycobacterium tuberculosis* in mice. *Proc Natl Acad Sci USA*  
500 100:10026-10031.
- 501 9. Park KT, Allen AJ, Bannantine JP, Seo KS, Hamilton MJ, Abdellrazeq GS, Rihan HM,  
502 Grimm A, Davis WC. 2011. Evaluation of two mutants of *Mycobacterium avium* subsp.  
503 paratuberculosis as candidates for a live attenuated vaccine for Johne's disease. *Vaccine*  
504 29:4709-19.
- 505 10. Park KT, ElNaggar MM, Abdellrazeq GS, Bannantine JP, Mack V, Fry LM, Davis WC.  
506 2016. Phenotype and Function of CD209+ Bovine Blood Dendritic Cells, Monocyte-  
507 Derived-Dendritic Cells and Monocyte-Derived Macrophages. *PLoS One* 11:e0165247.
- 508 11. Li L, Bannantine JP, Zhang Q, Amonsin A, May BJ, Alt D, Banerji N, Kanjilal S, Kapur  
509 V. 2005. The complete genome sequence of *Mycobacterium avium* subspecies  
510 paratuberculosis. *Proc Natl Acad Sci U S A* 102:12344-12349.
- 511 12. Planesse C, Nativel B, Iwema T, Gasque P, Robert-Da Silva C, Viranaicken W. 2015.  
512 Recombinant human HSP60 produced in ClearColi BL21(DE3) does not activate the  
513 NFkappaB pathway. *Cytokine* 73:190-5.
- 514 13. Park KT, Dahl JL, Bannantine JP, Barletta RG, Ahn J, Allen AJ, Hamilton MJ, Davis  
515 WC. 2008. Demonstration of allelic exchange in the slow-growing bacterium

- 516            *Mycobacterium avium* subsp. *paratuberculosis*, and generation of mutants with deletions  
517            at the *pknG*, *relA*, and *Isr2* loci. *Appl Environ Microbiol* 74:1687-1695.
- 518    14.    Park KT, Burnett S, Davis WC. 2015. Development and characterization of a monoclonal  
519            antibody specific for bovine CD209. *Vet Immunol Immunopathol* 163:216-20.
- 520    15.    Park KT, Seo KS, Godwin NA, Van Wie BJ, Gulbahar MY, Park YH, Davis WC. 2015.  
521            Characterization and expression of monoclonal antibody-defined molecules on resting  
522            and activated bovine alphabeta, gammadelta T and NK cells. *Vet Immunol*  
523            *Immunopathol* 168:118-30.
- 524    16.    Elnaggar MM, Abdellrazeq GS, Mack V, Fry LM, Davis WC, Park KT. 2016.  
525            Characterization and use of new monoclonal antibodies to CD11c, CD14, and CD163 to  
526            analyze the phenotypic complexity of ruminant monocyte subsets. *Vet Immunol*  
527            *Immunopathol* 178:57-63.
- 528    17.    Park KT, Allen AJ, Davis WC. 2014. Development of a novel DNA extraction method  
529            for identification and quantification of *Mycobacterium avium* subsp. *paratuberculosis*  
530            from tissue samples by real-time PCR. *J Microbiol Methods* 99:58-65.
- 531    18.    Kralik P, Nocker A, Pavlik I. 2010. *Mycobacterium avium* subsp. *paratuberculosis*  
532            viability determination using F57 quantitative PCR in combination with propidium  
533            monoazide treatment. *Int J Food Microbiol* 141 Suppl 1:S80-S86.
- 534    19.    Schonenbrucher H, Abdulmawjood A, Failing K, Bulte M. 2008. New triplex real-time  
535            PCR assay for detection of *Mycobacterium avium* subsp. *paratuberculosis* in bovine  
536            feces. *Appl Environ Microbiol* 74:2751-8.



- 537 20. Allen AJ, Park KT, Barrington GM, Hamilton MJ, Davis WC. 2009. Development of a  
538 bovine ileal cannulation model to study the immune response and mechanisms of  
539 pathogenesis paratuberculosis. *Clin Vaccine Immunol* 16:453-463.
- 540 21. Blander JM. 2018. Regulation of the Cell Biology of Antigen Cross-Presentation. *Annu*  
541 *Rev Immunol* 36:717-753.
- 542 22. Cruz FM, Colbert JD, Merino E, Kriegsman BA, Rock KL. 2017. The Biology and  
543 Underlying Mechanisms of Cross-Presentation of Exogenous Antigens on MHC-I  
544 Molecules. *Annu Rev Immunol* 35:149-176.
- 545 23. Rahemtulla A, Fung-Leung WP, Schilham MW, Kündig TM, Sambhara SR, Narendran  
546 A, Arabian A, Wakeham A, Paige CJ, Zinkernagel RM, Miller RG, Mak TW. 1991.  
547 Normal development and function of CD8<sup>+</sup> cells but markedly decreased helper cell  
548 activity in mice lacking CD4. *Nature* 353:180-184.
- 549 24. Bachmann MF, Zinkernagel RM, Oxenius A. 1998. Immune responses in the absence of  
550 costimulation: viruses know the trick. *J Immunol* 161:5791-4.
- 551 25. Bevan MJ. 2004. Helping the CD8(+) T-cell response. *Nat Rev Immunol* 4:595-602.
- 552 26. Janssen EM, Lemmens EE, Wolfe T, Christen U, von Herrath MG, Schoenberger SP.  
553 2003. CD4<sup>+</sup> T cells are required for secondary expansion and memory in CD8<sup>+</sup> T  
554 lymphocytes. *Nature* 421:852-6.
- 555 27. Shedlock DJ, Shen H. 2003. Requirement for CD4 T cell help in generating functional  
556 CD8 T cell memory. *Science* 300:337-339.
- 557 28. Sun JC, Bevan MJ. 2003. Defective CD8 T cell memory following acute infection  
558 without CD4 T cell help. *Science* 300:339-342.

- 559 29. Theisen D, Murphy K. 2017. The role of cDC1s in vivo: CD8 T cell priming through  
560 cross-presentation. *F1000Res* 6:98.
- 561 30. Shugart JA, Bambina S, Alice AF, Montler R, Bahjat KS. 2013. A self-help program for  
562 memory CD8<sup>+</sup> T cells: positive feedback via CD40-CD40L signaling as a critical  
563 determinant of secondary expansion. *PLoS One* 8:e64878.
- 564 31. Kim J, Gambhir V, Alatery A, Basta S. 2010. Delivery of Exogenous Antigens to Induce  
565 Cytotoxic CD8<sup>+</sup> T Lymphocyte Responses. *J Biomed Biotechnol* 2010:218752.
- 566 32. Smith CM, Wilson NS, Waithman J, Villadangos JA, Carbone FR, Heath WR, Belz GT.  
567 2004. Cognate CD4<sup>+</sup> T cell licensing of dendritic cells in CD8<sup>+</sup> T cell immunity. *Nat*  
568 *Immunol* 5:1143-1148.
- 569 33. Behrens G, Li M, Smith CM, Belz GT, Mintern J, Carbone FR, Heath WR. 2004. Helper  
570 T cells, dendritic cells and CTL Immunity. *Immunol Cell Biol* 82:84-90.
- 571 34. Taracha ELN, Awino E, McKeever DJ. 1997. Distinct CD4<sup>+</sup> T cell helper requirements  
572 in *Theileria parva*-immune and -naive bovine CTL precursors. *J Immunol* 159:4539-  
573 4545.

574

575

576 **Footnotes**

577 **Funding**

578 Support was provided by the Wash. State Univ. Monoclonal Antibody Center.

579

580 **Authors' contributions**

581 GSA and WCD conceived the study. GSA and WCD participated in the design of the protocol to  
582 conduct the studies. JPB participated in the development and use of the *Map* major membrane  
583 protein (MMP). GSA conducted the experiments. MME, AHM and VH participated in the  
584 conduct of the experiments. GSA and DAS participated in statistical analysis of the data. GSA,  
585 LMF, MME, AHM, KTP, WCD, JPB, DAS, and WMC participated in the writing and  
586 interpretation of the results. WCD and JPB obtained the funding for the project. WCD oversaw  
587 and participated in all aspects of the study. All authors read and approved the final manuscript.

588

589 Address correspondence and reprint requests to Dr. William C. Davis, Department Veterinary  
590 Microbiology/Pathology, Washington State University, Pullman, WA 99164-7040. E-mail  
591 address: davisw@wsu.edu

592

593 Abbreviations used in this article: mdPBMC, monocyte-depleted peripheral blood mononuclear  
594 cells; cDC, conventional dendritic cells; MoDC, monocyte-derived DC; MoMΦ, monocyte-  
595 derived macrophages; *Map*, *Mycobacterium avium* subsp. *paratuberculosis*; WT, wild type;

596 MMP, 35 kDa membrane peptide; PMA, Propidium monoazide; qPCR, quantitative PCR; C<sub>T</sub>,  
597 cycle threshold.

598

599

600

601

602

603

604

605

606

607

608

609

610

611

612

613

614

615 **FIGURE 1.** Flow diagram illustrating preparation of mdPBMC for analysis of the immune  
616 response to MMP ex vivo. See methods for detail.

617 **FIGURE 2.** Flow cytometric gating strategy. Gates were used to isolate CD4 and CD8 T cell  
618 subsets for analysis of their proliferative response following stimulation with cDC and MoDC  
619 pulsed with MMP. (A) Two light scatter parameters, side scatter (SSC) vs forward scatter (FSC)  
620 were used to identify the small lymphocytes (G1, color coded red) and large activated  
621 lymphocytes (G2, color coded blue) based on size and granularity. (B) A pulse geometry gate  
622 (FSC-H vs FSC-W) was placed on single cells (G3) to exclude doublets. (C) A fourth gate (G4)  
623 was used to isolate CD4 and CD8 T cells to determine their activation status. For data analysis,  
624 FSC vs CD45R0 (a memory T cell marker) was used to distinguish non-activated memory cells  
625 (red) from activated memory cells (blue) proliferating in response to stimulation with MMP. (D)  
626 Only the activated memory cells (upper right quadrant in the dot plot) were considered for  
627 statistical analysis.

628 **FIGURE 3. The role of cellular context on CD4 and CD8 T cell activation by MMP.** Two-  
629 rounds of stimulation of unseparated mdPBMC (all mdPBMC) with MMP increased the  
630 percentages of activated CD4 T cells and CD8 T cells (control vs MMP). The percentages of  
631 activated CD4 T cells and CD8 T cells after stimulation were not significantly reduced if the  
632 mdPBMC were first depleted of  $\gamma\delta$  T cells (cellular context: CD4/CD8 T cells versus all  
633 mdPBMC). The percentage of activated CD4 T cells after stimulation was reduced if the  
634 mdPBMC were depleted of  $\gamma\delta$  T cells and CD8 T cells (CD4 T cells versus all mdPBMC, and  
635 versus CD4/CD8 T cells). The percentage of activated CD8 T cells after stimulation was  
636 similarly reduced if the mdPBMC were first depleted of  $\gamma\delta$  T cells and CD4 T cells (CD8 T cells

637 versus all mdPBMC, and versus CD4/CD8 T cells). Data shown are the least squares means and  
638 standard deviations for experiments on blood collected from 3 steers. Significance symbols  
639 represent  $P$ -values adjusted for all pairwise comparisons such that: \*,  $P_{adj} < 0.05$ ; \*\*,  $P_{adj} < 0.01$ ;  
640 \*\*\*,  $P_{adj} < 0.001$ .

641 **FIGURE 4. The role of cellular context during stimulation by MMP on intracellular killing**  
642 **of *Map*.** Illustration of data presented on a representative standard DNA curve. The number of  
643 live bacteria were estimated by qPCR ( $C_T$  values). Standards of live:dead *Map* bacteria are  
644 labeled above the data (blue connectors). Note that the relationship of  $C_T$  values with live  
645 bacterial content (log of F57 quantity) is inverse and linear within the effect range of interest.  
646 Experiment test conditions (MMP stimulation and cellular context of mdPBMC) are noted below  
647 the data (independently colored shapes).

648 **FIGURE 5. Cumulative  $C_T$  values of intracellular killing of *Map*.** In comparison to control  
649 conditions (left most solid bars), significant killing of *Map* (reduced live bacteria = higher value)  
650 was detected after infected MoMΦ were co-cultured 24-hours with unseparated mdPBMC  
651 stimulated by MMP (open bar). Manipulation of cellular context during stimulation of mdPBMC  
652 with MMP (rightmost solid bars) did not significantly reduce intracellular killing with depletion  
653 of only gamma-delta T cells (cellular context: “CD4/CD8 T cells-T24”) but was significantly  
654 reduced if mdPBMC were also depleted of CD4 T cells (CD8 T cells-T24) or CD8 T cells (CD4  
655 T cells-T24). Data shown are the least squares means and standard deviations for experiments on  
656 blood collected from 3 steers. Significance symbols represent  $P$ -values adjusted for multiple  
657 comparisons to the condition of maximum killing activity (open bar) such that: \*,  $P_{adj} < 0.05$ ; \*\*,  
658  $P_{adj} < 0.01$ ; \*\*\*,  $P_{adj} < 0.001$ .

659

660 **FIGURE 6. The effect of anti-MHC antibodies present in mdPBMC during stimulation by**  
661 **MMP on intracellular killing of *Map*.** In comparison to control conditions (leftmost solid bars),  
662 significant killing of *Map* (reduced live bacteria = higher  $C_T$  value) was detected after infected  
663 MoM $\Phi$  were co-cultured 24-hours with unseparated mdPBMC stimulated by MMP (open bar).  
664 The presence of antibodies to MHC I, MHC II, or both MHC I and MHC II during stimulation of  
665 mdPBMC with MMP (rightmost solid bars) significantly reduced cell proliferation and  
666 intracellular killing of *Map*. Data shown are the least squares means and standard deviations for  
667 experiments on blood collected from 3 steers. Significance symbols represent *P*-values adjusted  
668 for multiple comparisons to the condition of maximum killing activity (open bar) such that: \*,  
669  $P_{adj} < 0.05$ ; \*\*,  $P_{adj} < 0.01$ ; \*\*\*,  $P_{adj} < 0.001$ .

670

671

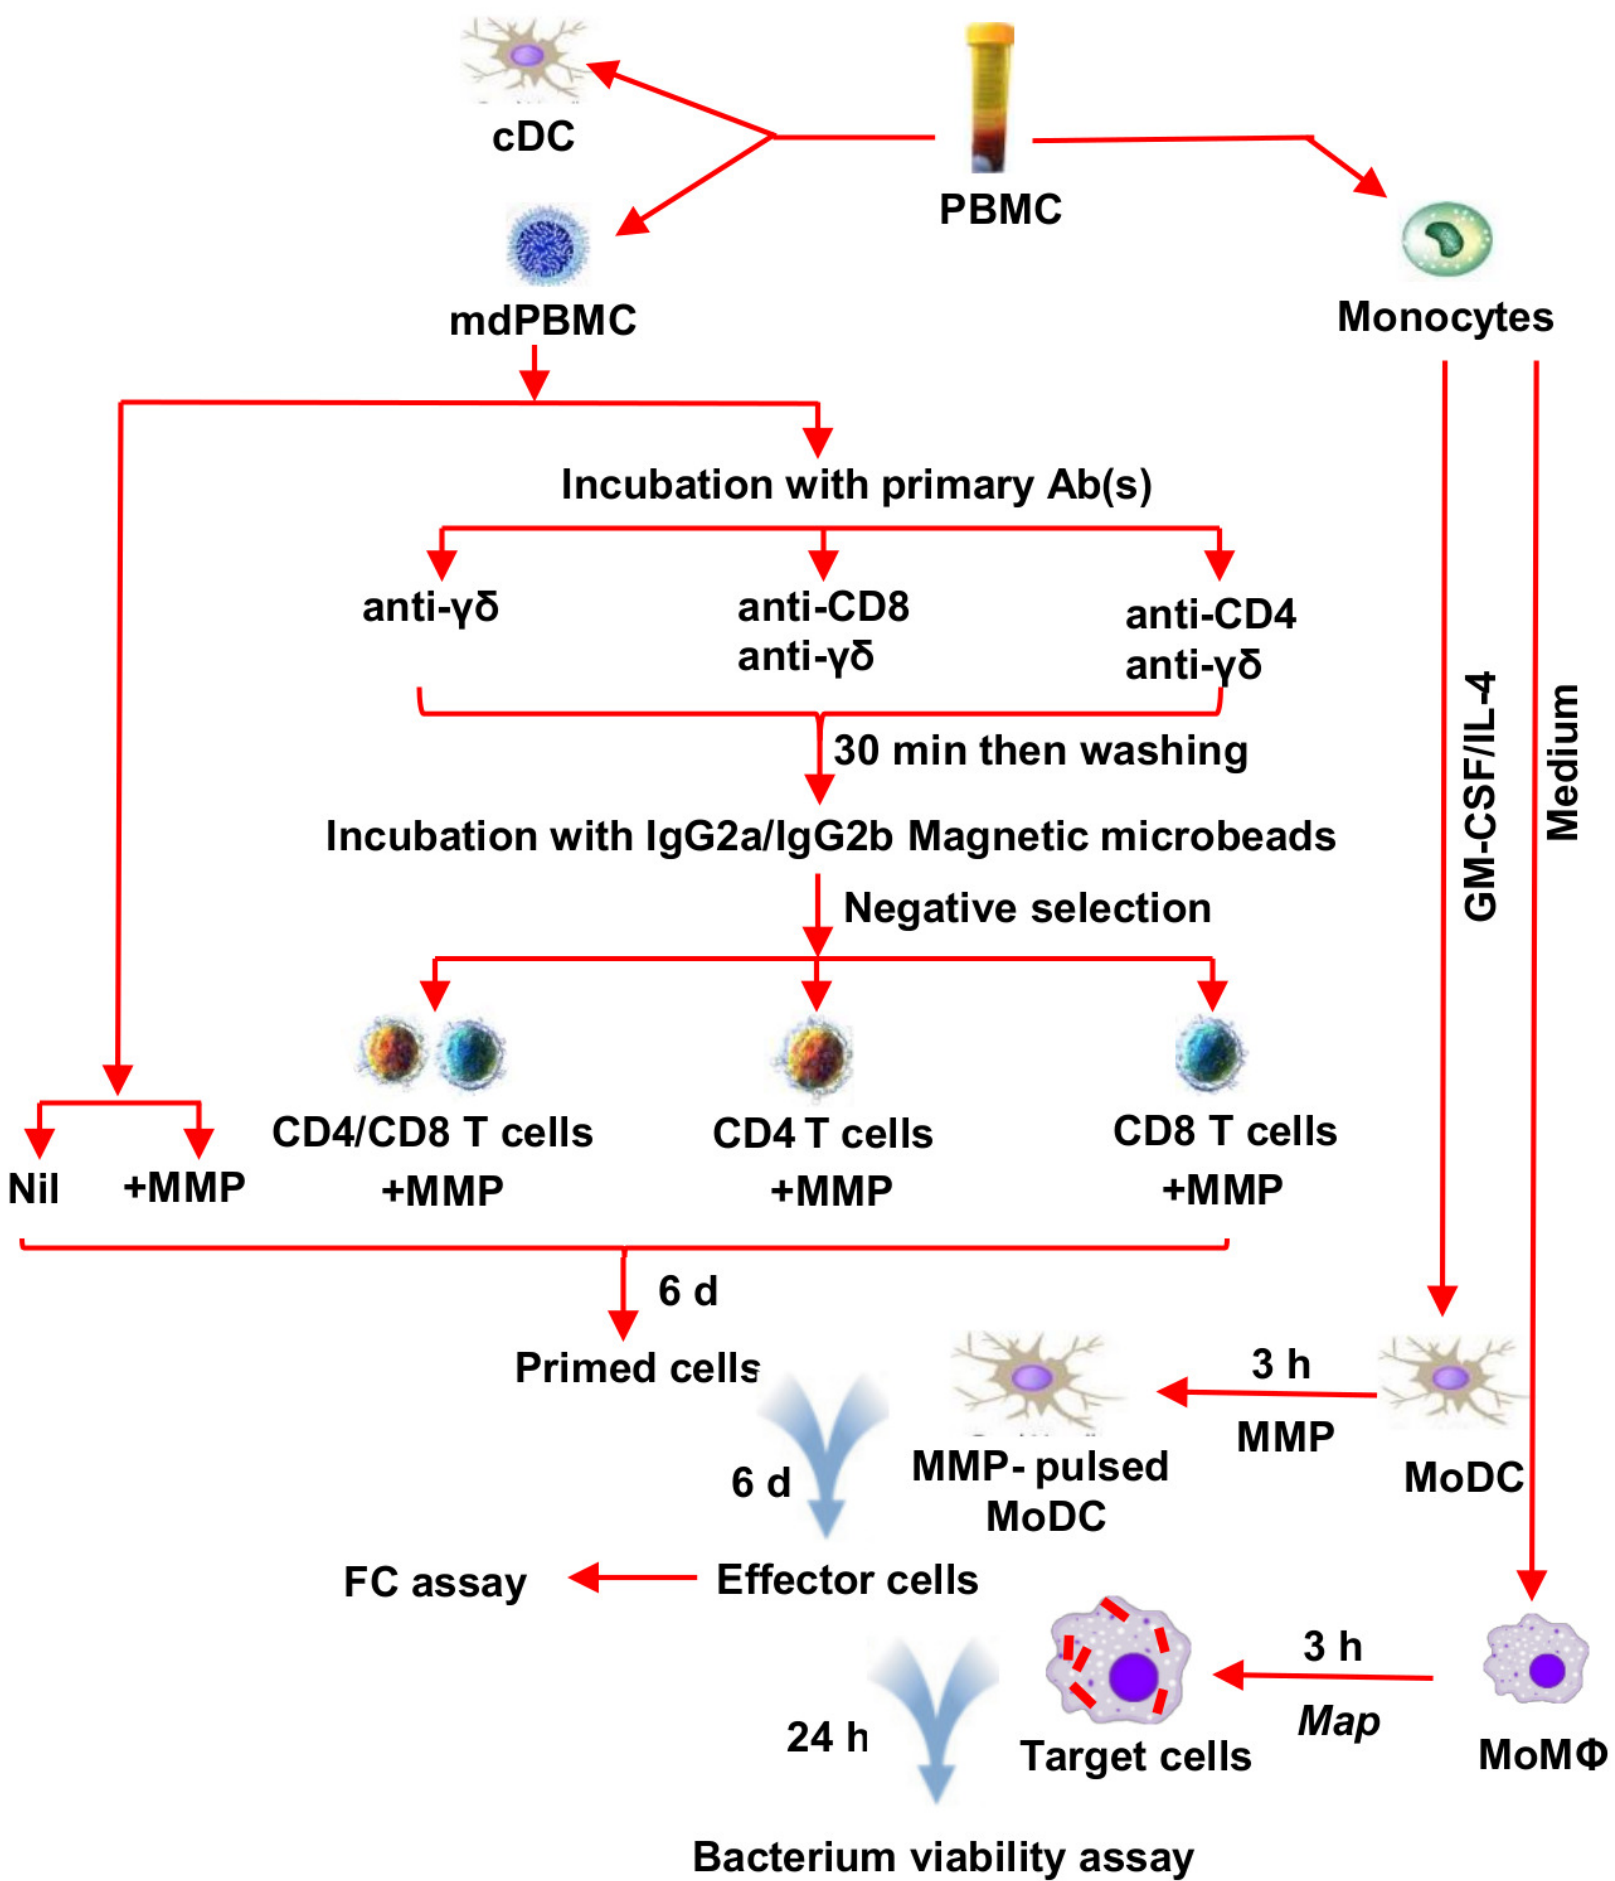



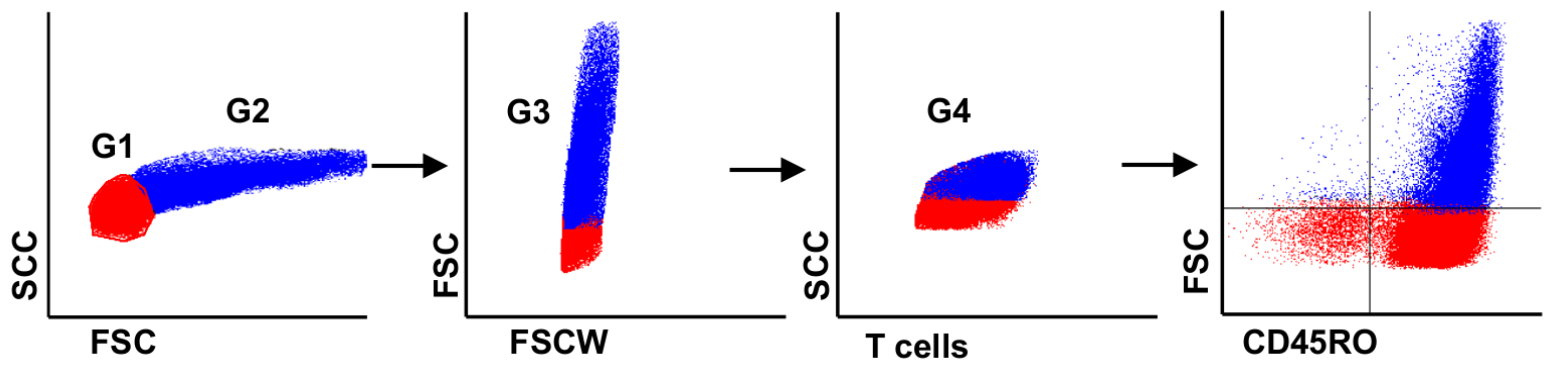

### CD4 T cells

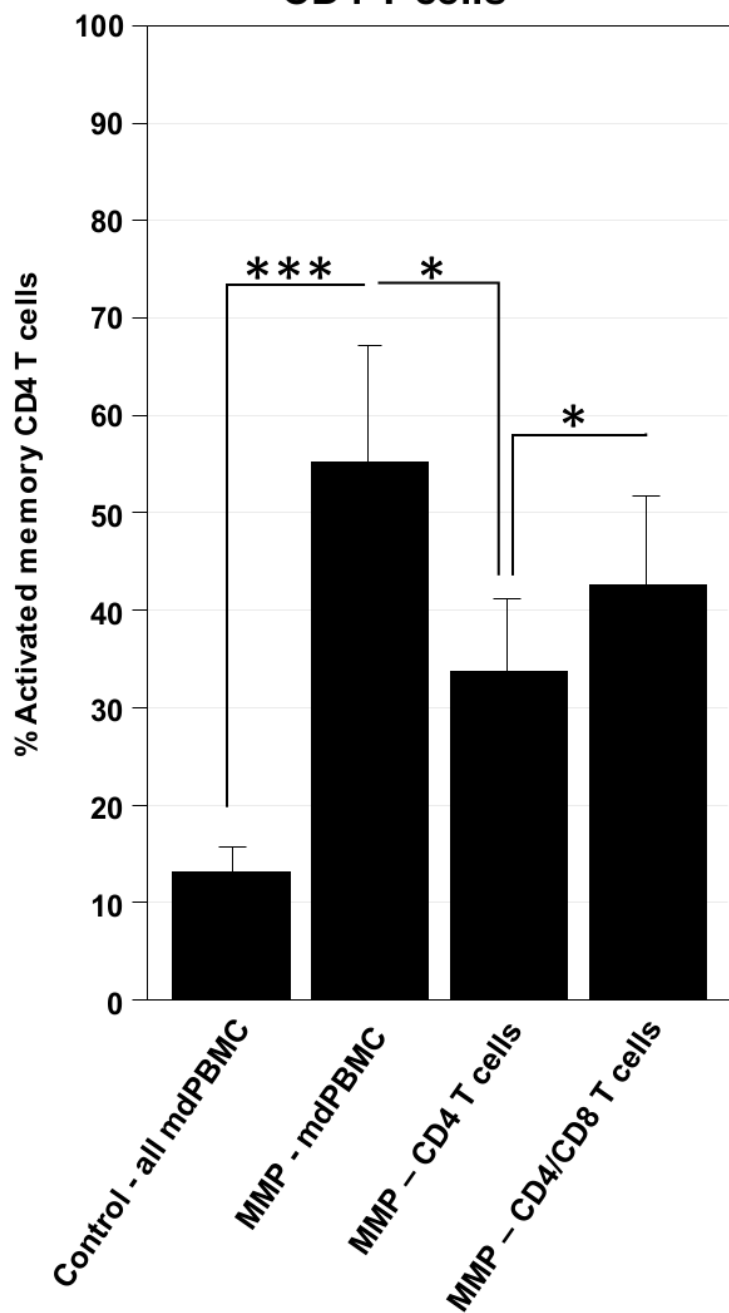

### CD8 T cells

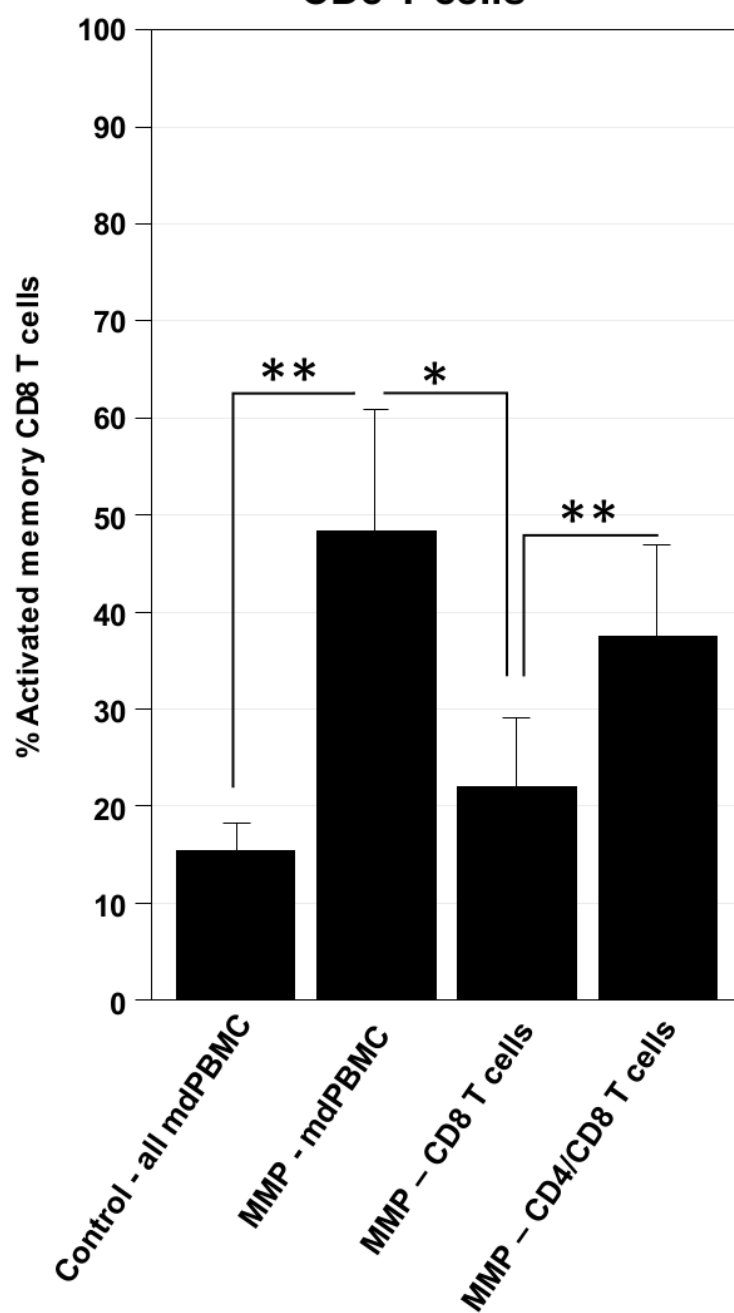

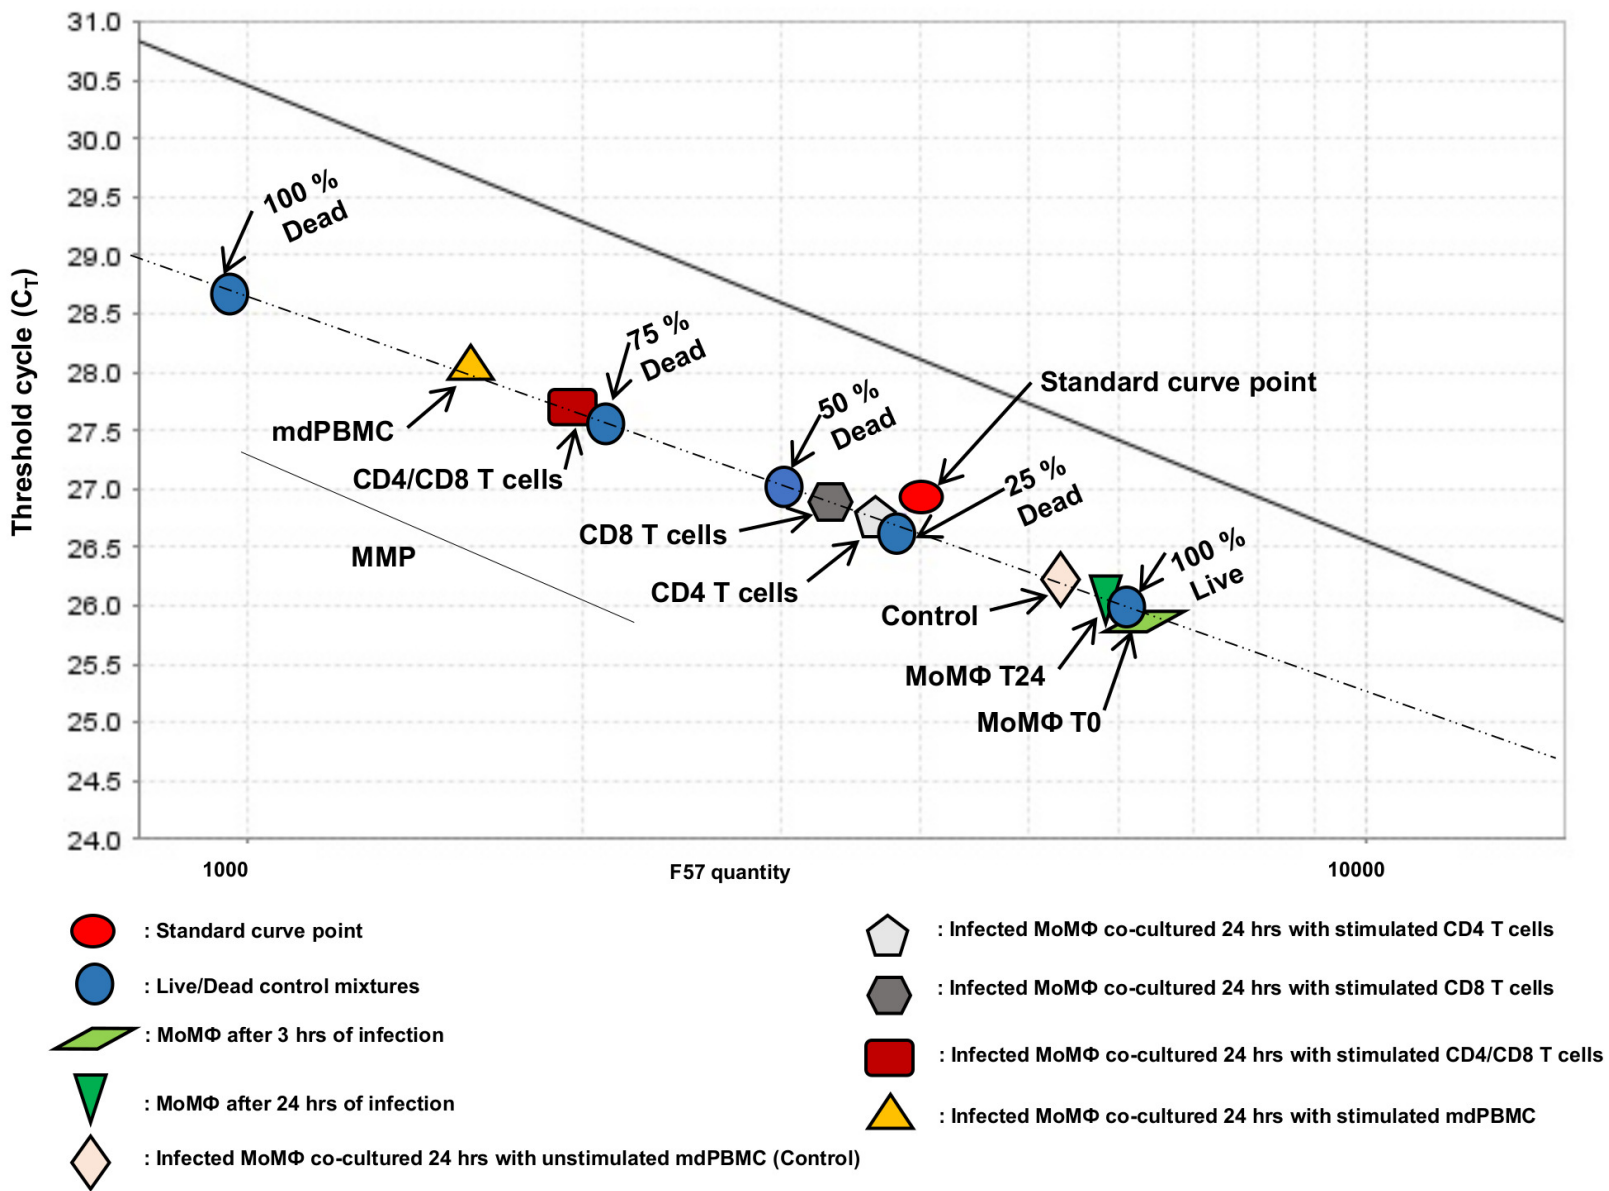

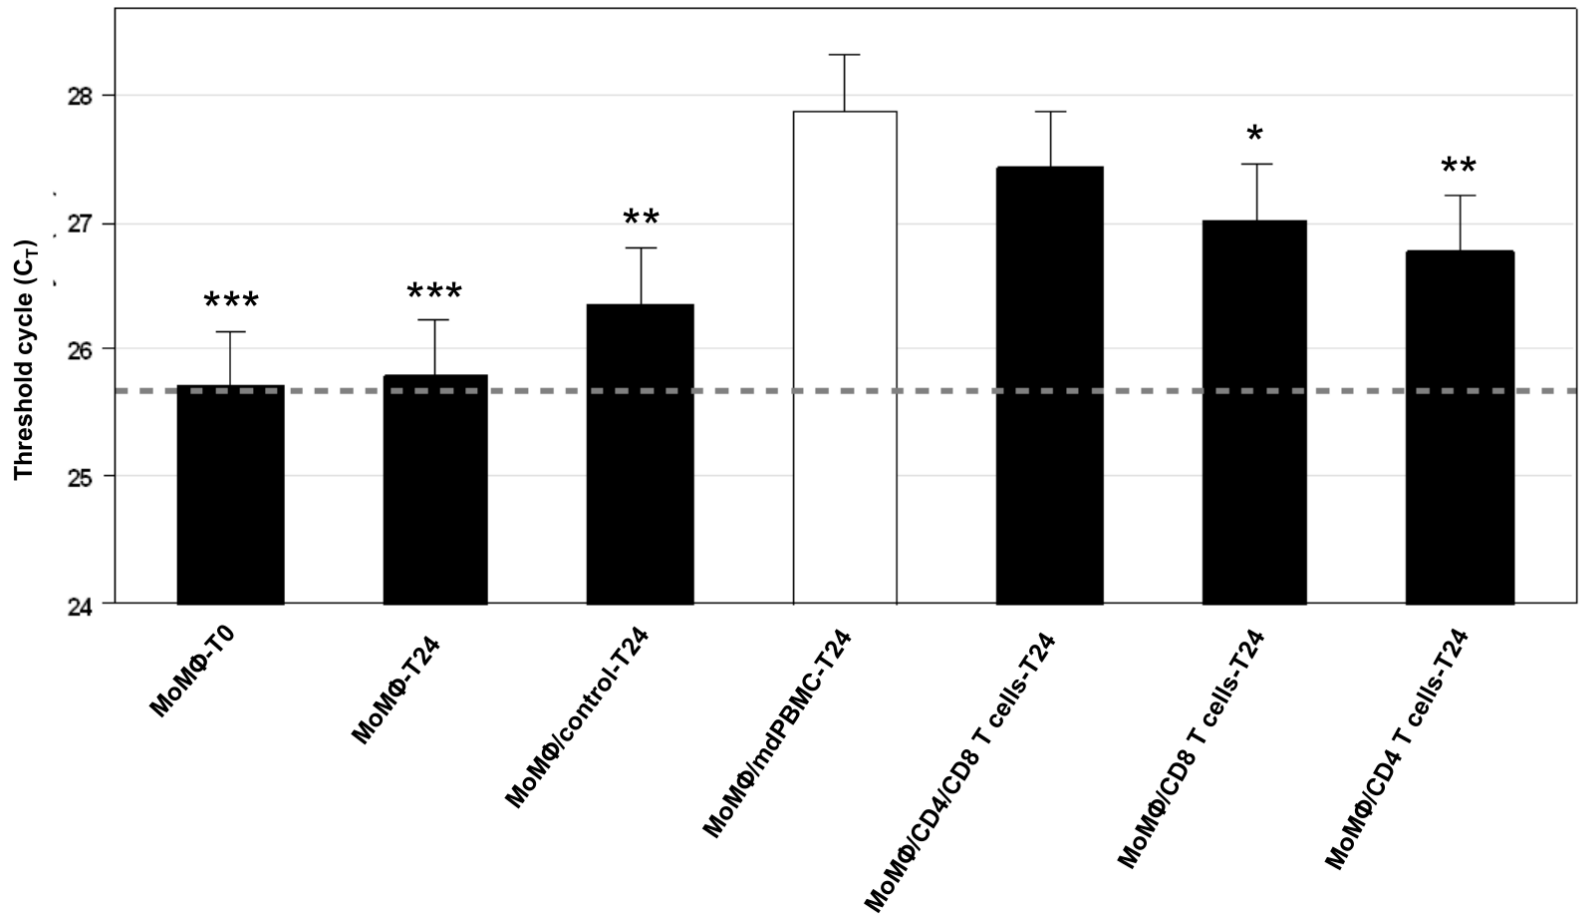

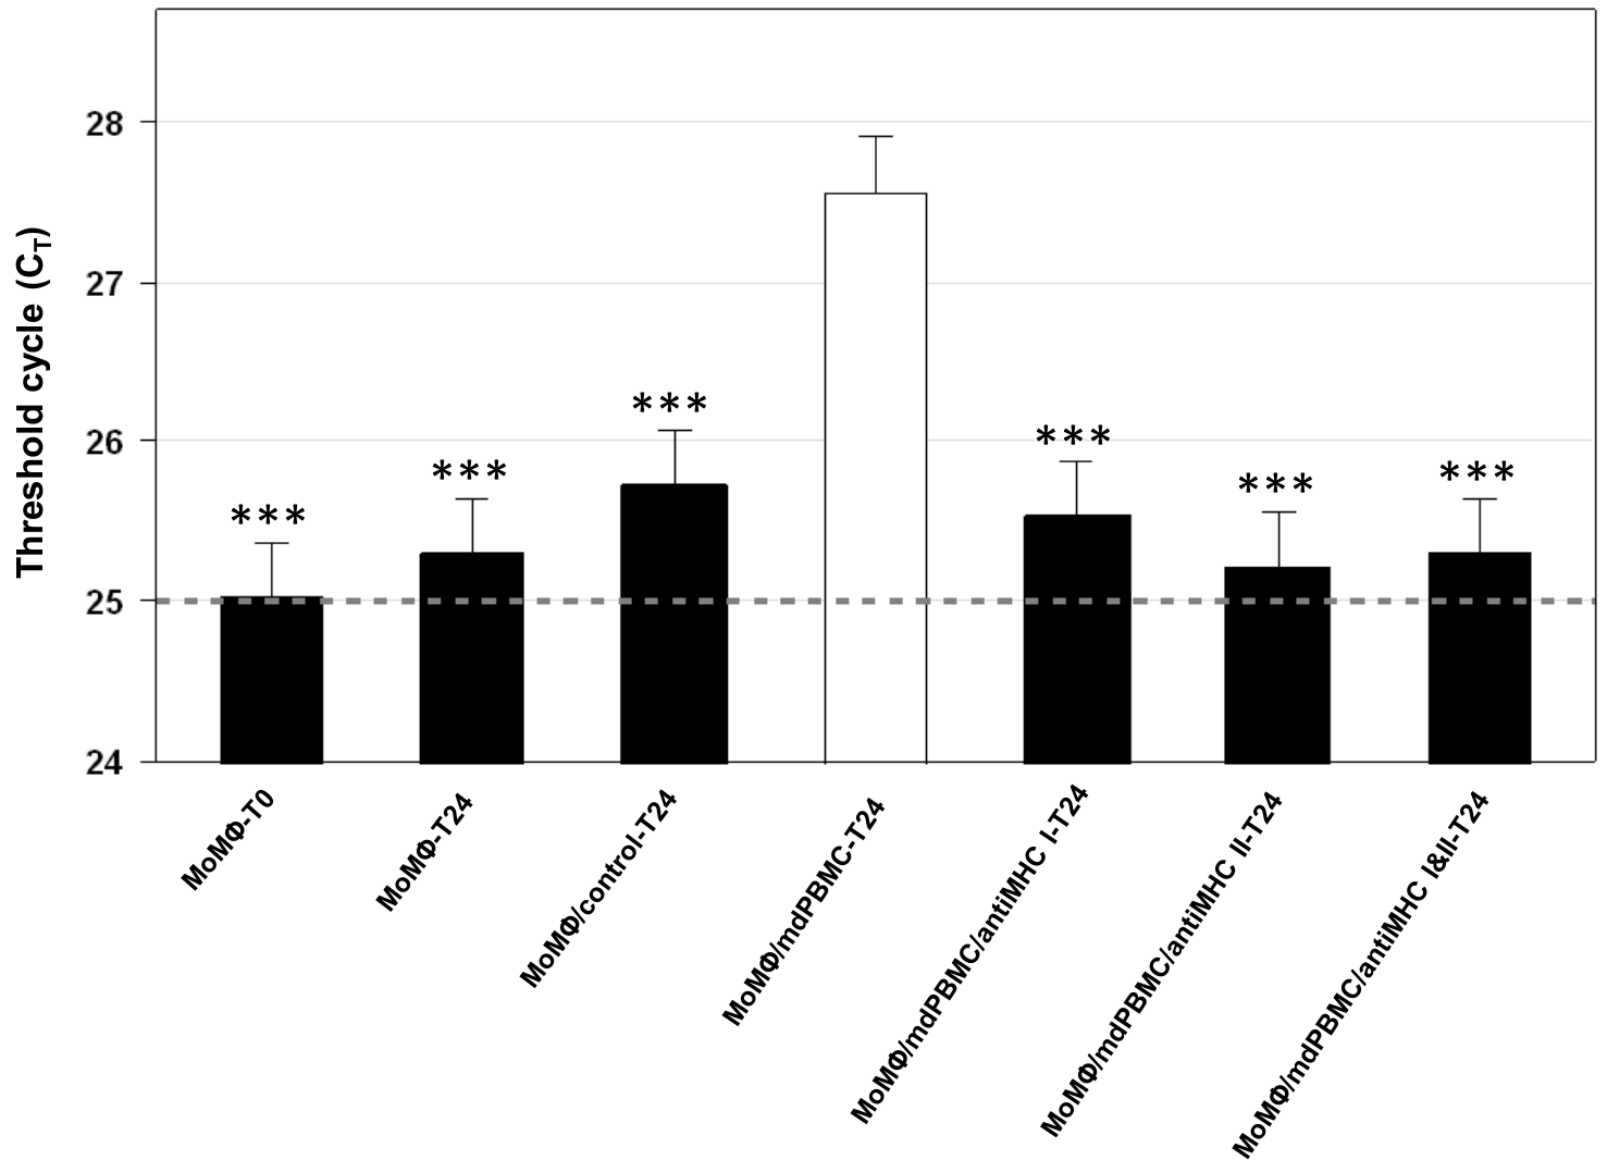

**Table I. Monoclonal antibodies used in the present study**

| mAb      | Isotype | Specificity    |
|----------|---------|----------------|
| CAM36A   | IgG1    | CD14           |
| CAM66A   | IgM     | CD14           |
| 209MD26A | IgG2a   | CD209          |
| ILA11A   | IgG2a   | CD4            |
| CACT138A | IgG1    | CD4            |
| 7C2B     | IgG2a   | CD8            |
| CACT80C  | IgG1    | CD8            |
| ILA116A  | IgG3    | CD45R0         |
| H58A     | IgG2a   | MHC I          |
| PT85A    | IgG2a   | MHC I          |
| TH14B    | IgG2a   | MHC II BoLA DR |
| TH81A5   | IgG2a   | MHC II BoLA DQ |
| CAT82A   | IgG1    | MHC II         |
